# Supplementary material for: Combined effects of low temperature and low light intensity on elemental content and macromolecules of coccolithophores
Source: Copernicus journal article supplement (doi:10.5194/egusphere-2025-5131), 2025-11-18
Supplement: Supplementary file [file egusphere-2025-5131-AC4-supplement.pdf]

1 **Combined effects of low temperature and low light intensity on elemental**  
2 **stoichiometry and macromolecules of coccolithophores**

3  
4 **Jinlong Shang<sup>1,§</sup>, Wenting Ke<sup>2,§</sup>, Yinrui Wang<sup>3,§</sup>, Junqin Cai<sup>3</sup>, Yan Chen<sup>3</sup>, Xi Liu<sup>3</sup>,**  
5 **Yonghe Han<sup>3</sup>, Hong Zhang<sup>3</sup>, Kui Xu<sup>4</sup>, Yong Zhang<sup>3</sup>**

6  
7 <sup>1</sup>College of Life Science and Xinjiang Key Laboratory of Special Species Conservation  
8 and Regulatory Biology, Xinjiang Normal University, Urumqi 830054, Xinjiang, China

9 <sup>2</sup>School of Primary Education, Wuhan City Polytechnic, Wuhan 430065, China

10 <sup>3</sup>College of Environmental and Resource Sciences, College of Carbon Neutral Modern  
11 Industry, Fujian Key Laboratory of Pollution Control and Resource Recycling, Fujian  
12 Normal University, Fuzhou 350117, China

13 <sup>4</sup>Hubei Key Laboratory of Edible Wild Plants Conservation and Utilization, Hubei  
14 Engineering Research Center of Special Wild Vegetables Breeding and Comprehensive  
15 Utilization Technology, College of Life Sciences, Hubei Normal University, Huangshi  
16 435002, China

17  
18 Running head: Temperature and light on coccolithophores

19  
20 Correspondence to: Wenting Ke (kewenting@whcp.edu.cn); Yong Zhang  
21 (yongzhang@fjnu.edu.cn)

22 <sup>§</sup>These authors contributed equally to this work.

23  
24 Keywords: coccolithophores, elemental content, low temperature, low light intensity,  
25 macromolecules

26 **Abstract**

27 The calcifying coccolithophores *Gephyrocapsa oceanica* and *Emiliana huxleyi* are  
28 capable of growing preferentially in deep waters (150–200 m), yet their physiological  
29 and biochemical strategies for acclimating to the combined stress of low temperature  
30 and low irradiance remain unclear. In this study, we exposed three coccolithophore  
31 strains (*G. oceanica* NIES–1318, *E. huxleyi* PML B92/11, and RCC1266) to low  
32 temperature (9 °C) and low light intensity (15  $\mu\text{mol photons m}^{-2} \text{s}^{-1}$ ), and compared  
33 their growth rates, particulate inorganic carbon (PIC), particulate organic carbon (POC),  
34 nitrogen (PON) and phosphorus (POP) contents, as well as carbohydrate and lipid levels,  
35 with those measured under standard cultivation condition (21°C, 150  $\mu\text{mol photons m}^{-2}$   
36  $\text{s}^{-1}$ ). The results showed that low temperature and low light intensity acted  
37 synergistically to reduce growth rates, POC contents and the POC : PON and POC :  
38 POP ratios, while POP contents remained largely unaffected across all strains. Higher  
39 light intensity increased PIC and PON contents under high temperature, but decreased  
40 them under low temperature. Low light intensity was identified as the primary driver  
41 of reduced carbohydrate and lipid levels. Collectively, these findings suggest that, to  
42 acclimate to low–temperature and low–light conditions, coccolithophores prioritized  
43 reducing the metabolic cost associated with carbohydrate and lipid biosynthesis,  
44 thereby allocating more resources to phosphorus metabolism—a physiological  
45 adjustment that could significantly influence biogeochemical cycles in the deep ocean.

46

47

48

49

50

## 51 **1 Introduction**

52 Coccolithophores are unicellular eukaryotic calcifying algae widely distributed  
53 throughout the global oceans (Hernández–Almeida et al., 2020). Through  
54 photosynthesis, they fix CO<sub>2</sub> into organic carbon, while their calcification process  
55 produces CaCO<sub>3</sub> (coccoliths) and releases CO<sub>2</sub> into the surrounding environment. This  
56 combined effect not only enhances particle settling but also facilitates carbon burial at  
57 depth (Skeffington et al., 2022). Hence, coccolithophores are important contributors to  
58 the biological and carbonate counter pump (Li et al., 2024). Their comparatively low  
59 requirements of nitrogen and phosphorus enable dominance in oligotrophic provinces,  
60 e.g., Eastern Mediterranean (Malinverno et al., 2003), and the bloom–forming species  
61 such as *Gephyrocapsa oceanica* and *Emiliana huxleyi* can restructure local ecosystem  
62 function (Poulton et al., 2014). Notably, coccolithophores are capable of carrying out  
63 photosynthesis and osmotrophy (heterotrophic) near or below the base of the euphotic  
64 zone (150–200 m)—e.g., in the north–eastern Caribbean and South Pacific Gyre with  
65 low temperature (< 12°C) and low irradiance level (< 20 μmol photons m<sup>-2</sup> s<sup>-1</sup>), and  
66 occupying resource niches that contribute to the stability of deep–water primary  
67 production (Jordan and Winter, 2000; Beaufort et al., 2007; Balch et al., 2023). Despite  
68 their ecological prominence, the physiological and biochemical strategies that enable  
69 coccolithophores to tolerate the combined constraints of low temperature and low  
70 irradiance in deeper waters remain poorly resolved.

71 Prior work has identified several low–temperature acclimate strategies in  
72 coccolithophores. Under decreasing temperature, *G. oceanica* increases its cellular  
73 particulate organic carbon (POC) and nitrogen (PON) content, while decreases its  
74 chlorophyll *a* and alkenone contents (Torres–Romero et al., 2024). The biochemical  
75 basis for elevated POC and PON under low temperature may involve a reduction in

76 enzymatic turnover rates or productivity due to decreased activity of thermally sensitive  
77 enzymes, accompanied by an increase in the abundances of these enzymes to partially  
78 compensate for their lower efficiency (Petrou et al., 2016). For instance, the abundance  
79 of the carboxylating enzyme Rubisco (Ribulose-1,5-bisphosphate  
80 carboxylase/oxygenase) is two to three times higher in phytoplankton from the  
81 Southern Ocean than in those from temperate oceans (Sage, 2002; Young et al., 2015).  
82 Additionally, the coccolithophore *G. oceanica* and *E. huxleyi* produce unsaturated  
83 long-chain alkenones (C37–C39) (Conte et al., 1998) and increase their degree of  
84 unsaturation to modulate the microstructure of membrane lipids, thereby enhancing  
85 membrane stability under low temperature conditions (Conte et al., 2006). Together,  
86 these studies elucidate the physiological and biochemical mechanisms underlying  
87 coccolithophore adaptation to low temperatures (Dedman et al., 2023; Torres–Romero  
88 et al., 2024). However, little attention has been paid to the biogeochemical  
89 consequences of coccolithophores under low temperature conditions, particularly the  
90 responses of their carbon (C) : nitrogen (N) : phosphorus (P) ratios and the potential  
91 impacts on deep-sea ecosystems.

92 Coccolithophores exhibit unique features in their response to low light conditions.  
93 Recently, Shen et al. (2025a) purified a photosystem I (PSI)–fucoxanthin chlorophyll  
94 a/c-binding protein (PSI–FCPI) supercomplex from the coccolithophore *E. huxleyi*  
95 (Eh). This monomeric supercomplex contains 12 PSI core subunits, a specific luminal  
96 linker protein (EhLP), and 38 peripheral Eh–FCPI antennae, making it the largest PS–  
97 antenna supercomplex known to date. The high levels of chlorophyll c and fucoxanthin  
98 in this supercomplex enable fast kinetics and efficient absorption of blue–green light,  
99 which is particularly suited to the deep-ocean environment where *E. huxleyi* dwells  
100 (Shen et al., 2025a). Under low light intensity, coccolithophore increases their

101 functional absorption cross-section, quantum efficiency, and contents of Chl *a* and  
102 carotenoid to enhance light absorption (Zhang and Gao, 2021). Moreover, the refractive  
103 index of coccoliths (approximately 1.65) is higher than that of seawater (approximately  
104 1.33) (Horváth and Varjú, 2004). This structure feature allows coccoliths to acts as  
105 micro-lenses, focusing incoming blue-green light onto the chloroplasts and thereby  
106 increasing local light intensity (Young et al., 1999). Such light-concentrating effect can  
107 enhance photosynthetic efficiency, especially in the deep ocean (Triccas et al., 2025).  
108 However, to our knowledge, few studies have examined the variation in physiological  
109 and biochemical characteristics among different coccolithophore strains in response to  
110 low light intensity.

111 Most research on the combined effects of temperature and light intensity on  
112 coccolithophores has focused on range of 10–24°C and 60–480  $\mu\text{mol photons m}^{-2} \text{s}^{-1}$   
113 (Feng et al., 2008; Jin et al., 2019; Zhang et al., 2020), leaving the extreme condition  
114 of simultaneous low temperature and low light intensity largely unexplored. In this  
115 study, we exposed three coccolithophore strains to low temperature (9°C) and low light  
116 ( $15 \mu\text{mol photons m}^{-2} \text{s}^{-1}$ ), and compared their growth rates, particulate organic carbon  
117 (POC), nitrogen (PON) and phosphorus (POP), carbohydrate and lipid contents with  
118 those measured under standard cultivation conditions (21°C and  $150 \mu\text{mol photons m}^{-2} \text{s}^{-1}$ ).  
119 The aim was to investigate the physiological and biochemical responses of  
120 coccolithophores to these combined stressors and to assess their potential implications  
121 for the deep-sea carbon cycle.

122

## 123 **2 Materials and methods**

### 124 **2.1 Strains and culture conditions**

125 *Gephyrocapsa oceanica* strain NIES-1318 was originally isolated from the coastal

126 water in the East China Sea, and obtained from the center for collections of marine  
127 bacteria and algae, Xiamen University, China. *Emiliana huxleyi* strain PML B92/11  
128 was isolated from the coastal waters off Bergen, Norway (60 °N, 5 °E), and obtained  
129 from the plymouth algal culture collection, UK. *Emiliana huxleyi* strain RCC1266 was  
130 isolated from shelf waters around Ireland (49°30'N, 10°30'W), and obtained from the  
131 roscoff algal culture collection, France (Jin et al., 2019; Zhang et al., 2021).

132 In the control treatment, cells were maintained in 150  $\mu\text{mol photons m}^{-2} \text{s}^{-1}$  of  
133 photosynthetically active radiation (PAR, high light intensity, HL) (measured using a  
134 PAR Detector, PMA 2132 from solar light company) under a 16 h: 8 h light : dark cycle  
135 (light period: 06:00 to 22:00 h) at 21.0 °C (high temperature, HT) in semicontinuous  
136 cultures. To simulate deep-sea temperature and light intensity, experimental treatments  
137 included low temperature (LT: 9.0 °C), low light intensity (LL: 15  $\mu\text{mol photons m}^{-2} \text{s}^{-1}$ )  
138 and combination of low temperature and low light intensity (LTLL: 9.0 °C and 15  
139  $\mu\text{mol photons m}^{-2} \text{s}^{-1}$ ) (Jordan and Winter, 2000; Beaufort et al., 2007). Therefore, there  
140 were four treatments in this study: (1) 9.0 °C and 15  $\mu\text{mol photons m}^{-2} \text{s}^{-1}$  (LTLL), (2)  
141 9.0 °C and 150  $\mu\text{mol photons m}^{-2} \text{s}^{-1}$  (LTHL), (3) 21.0 °C and 15  $\mu\text{mol photons m}^{-2} \text{s}^{-1}$   
142 (HTLL), (4) 21.0 °C and 150  $\mu\text{mol photons m}^{-2} \text{s}^{-1}$  (HTHL, control), and three replicates  
143 for each treatment.

144 Three strains were cultured in natural seawater obtained from the Pingtan Island,  
145 Southeast China. The seawater was first filtered using a membrane filter (0.45  $\mu\text{m}$  pore  
146 size, CN-CA, Chuangwei), sterilized at 121°C for 20 minutes, and enriched with 64  
147  $\mu\text{mol L}^{-1} \text{NO}_3^-$ , 4  $\mu\text{mol L}^{-1} \text{PO}_4^{3-}$ , f/8 concentrations for trace metal and vitamin  
148 solutions (Guillard and Ryther 1962). Then enriched seawater was aerated with sterile  
149 ambient air (PVDF 0.22  $\mu\text{m}$  pore size, Simplepure, Haining) with about 400  $\mu\text{atm}$   
150 partial pressure of  $\text{CO}_2$  for 24 hours, and sterilized by gentle pressure filtration (0.22

151  $\mu\text{m}$  pore size, Polycap 75 AS, Whatman) and carefully pumped into autoclaved 500 mL  
152 and 2000 mL polycarbonate (PC) bottles.

153 Three strains were cultured at 21.0 °C and 150  $\mu\text{mol photons m}^{-2} \text{s}^{-1}$  with an initial  
154 cell concentration of about 3000 cells  $\text{mL}^{-1}$  and cultures were diluted every 3 days and  
155 maintained in exponential growth for 9 days with a minimum of 10 generations. After  
156 that, the cells of the same initial concentrations as above were transferred from 21.0 °C  
157 and 150  $\mu\text{mol photons m}^{-2} \text{s}^{-1}$  (HTHL) to 21.0 °C and 15  $\mu\text{mol photons m}^{-2} \text{s}^{-1}$  (HTLL)  
158 and to 9.0 °C and 150  $\mu\text{mol photons m}^{-2} \text{s}^{-1}$  (LTHL), and then from 9.0 °C and 150  $\mu\text{mol}$   
159  $\text{photons m}^{-2} \text{s}^{-1}$  to 9.0 °C and 15  $\mu\text{mol photons m}^{-2} \text{s}^{-1}$  (LTLL). Cultures were diluted  
160 every 3 or 4 days, and maintained in exponential growth for 15 or 16 days under the  
161 HTLL and LTHL treatments, and for 32 days for *G. oceanica* strain and for 20 days for  
162 two *E. huxleyi* strains under the LTLL treatment, which were dependent on cell division  
163 rates per day of each strain (Figure S1). Culture bottles were mixed three times per day  
164 at 09:00 h, 14:00 h and 18:00 h. In the last day of the incubation under each treatment,  
165 subsamples were taken for measurements of cellular contents of the total particulate  
166 carbon (TPC), particulate organic carbon (POC), nitrogen (PON) and phosphorus  
167 (POP), carbohydrate, lipid and chlorophyll (Chl) *a*.

168

## 169 **2.2 Cell density measurement**

170 After mixing, 2 mL samples for cell concentration measurement were taken daily at  
171 14:00 h, and fixed with 10  $\mu\text{L}$  Lugol's solution (a mixture of potassium iodide, iodine  
172 and sodium acetate). Then 1 mL samples were added into the counting chamber  
173 (Sedgwick–Rafter, S52, Graticules), and cell concentration was quantified by cell  
174 counting using a biological microscope (E100, Nikon Eclipse). Growth rate ( $\mu$ ) was  
175 calculated according to the equation:  $\mu = (\ln N_1 - \ln N_0) / d$ , where  $N_0$  and  $N_1$  were cell

176 concentrations at the beginning and the end of a growth interval, and  $d$  was the duration  
177 of the growth period in days (Wang et al., 2024).

178

### 179 **2.3 Element content measurements**

180 Samples for determinations of TPC (300 mL), POC and PON (300 mL), and POP (300  
181 mL) contents were gently filtered onto GF/F filters (pre-combusted at 450 °C for 5  
182 hours) at 15:00 hour under each treatment. TPC, POC and POP samples were stored in  
183 the dark at -20 °C. For POC measurements, samples were fumed with HCl for 12 hours  
184 to remove inorganic carbon. Then POC and TPC samples were dried at 60 °C for 12  
185 hours and analyzed using an Elemental CHNS analyser (Vario EL cube, GmbH,  
186 Germany). Cellular particulate inorganic carbon (PIC) content was calculated as the  
187 difference between TPC and POC (Fabry and Balch, 2010). To remove dissolved  
188 inorganic phosphorus from the GF/F filters, POP samples were rinsed three times with  
189 5 mL 0.17 mol L<sup>-1</sup> Na<sub>2</sub>SO<sub>4</sub>. After that, 2 mL 0.017 mol L<sup>-1</sup> MgSO<sub>4</sub> solution was added  
190 onto filters. Then POP samples were dried at 90 °C for 12 hours and combusted at 500  
191 °C for 6 hours to remove POC, then cooled and extracted by hydrolysis with 0.2 mol  
192 L<sup>-1</sup> HCl (Solórzano and Sharp, 1980). Phosphorus concentrations were determined  
193 using the ammonium molybdate method using adenosine-5-triphosphate disodium  
194 trihydrate (ATP007, Bioshop) as a standard.

195

### 196 **2.4 Chlorophyll *a*, carbohydrate and lipid analyses**

197 After mixing, samples for analyses of chlorophyll (Chl) *a* (100 mL), carbohydrate (500  
198 mL) and lipid (300 mL) were obtained by filtering onto pre-combusted GF/F filters (at  
199 450 °C for 5 hours) at 15:00 hour under each treatment. Five milliliters of 90% acetone  
200 was used to extract the Chl *a* at 4 °C for 24 hours. Then samples were centrifuged at

201 8000 rpm for 10 min at 4 °C and the absorbances of the supernatant were determined  
202 between 600–800 nm using a UV spectrophotometer (P5, Shanghai Mepada  
203 Instruments Ltd., China). Chl *a* concentration ( $\mu\text{g L}^{-1}$ ) of sample was calculated as  
204 follows (Ritchie 2006).

$$205 \quad \text{Chl } a = 11.93 \times (A_{664} - A_{750}) - 1.93 \times (A_{647} - A_{750})$$

206 where  $A_{647}$ ,  $A_{664}$  and  $A_{750}$  were the absorbance values of supernatant at 647, 664 and  
207 750 nm.

208 Carbohydrate samples were pretreated with 12.00 mol L<sup>-1</sup> of sulfuric acid (H<sub>2</sub>SO<sub>4</sub>)  
209 in the dark for 1 hour, and then diluted by Milli-Q water to a final H<sub>2</sub>SO<sub>4</sub> concentration  
210 of 1.20 mol L<sup>-1</sup>. Then samples were sonicated for 5 min, vortexed for 30 s and boiled  
211 at 90.0 °C for 3 hours (Pakulski and Benner, 1992). The concentration of  
212 monosaccharide was determined at 490 nm by phenol–sulfuric reaction with glucose as  
213 standard (Masuko et al., 2005).

214 Lipid samples were extracted with 2 mL dimethyl sulfoxide–methanol (v : v = 1 : 9),  
215 sonicated for 15 min, boiled at 60 °C for 30 min. Then samples were centrifuged (5 min,  
216 6000×g), and the oil–containing supernatants were transferred to a new tube (A, wight  
217  $W_A$ ) (Xu et al., 2020). The residue samples were treated with 4 mL ether–n–hexane (v :  
218 v = 1 : 1) for 1.5 h at 4 °C. Then samples were centrifuged again and the supernatants  
219 were transferred to tube A again. The lipid–containing phase was dried using a nitrogen  
220 blower and then tube A was weighed (wight  $W_B$ ) again. The lipid content was calculated  
221 as the difference between  $W_B$  and  $W_A$ .

222

## 223 **2.5 Data Analysis**

224 A two–way analysis of variance (ANOVA) was used to determine the main effect of  
225 temperature and light intensity and their interactions for all variables in this study. A

226 Tukey post hoc test was performed to identify significant differences between two  
227 levels of each treatment. A Shapiro–Wilk test was conducted to analyze the normality  
228 of residuals, and a Levene test was conducted to test for homogeneity of variances. The  
229 significant difference between treatments was set as  $p \leq 0.05$ . Data analysis and  
230 visualizations were made using R v.3.6.1 (R Core Team 2018) and packages ggplot2  
231 v.3.2.0.

232

### 233 **3 Results**

#### 234 **3.1 Growth rate and cellular Chl *a* content**

235 Low temperature and low light intensity acted synergistically to decrease growth rates  
236 of three strains, which can be seen by comparing growth rates in high temperature and  
237 high light (HTHL) condition with those in high temperature and low light (HTLL), low  
238 temperature and high light (LTHL), and low temperature and low light (LTLL)  
239 conditions (Tables 1, 2; Figure 1a, b, c). Compared to HTHL, growth rates of *G.*  
240 *oceanica* NIES–1318 decreased by  $34\% \pm 3\%$  in HTLL, by  $48\% \pm 1\%$  in LTHL,  
241 and by  $81\% \pm 3\%$  in LTLL (Tukey, all  $p < 0.01$ ) (Figure 1a). Similarly, compared to  
242 HTHL, growth rates of *E. huxleyi* PML B92/11 decreased by  $38\% \pm 1\%$  in HTLL, by  
243  $52\% \pm 1\%$  in LTHL, and by  $63\% \pm 3\%$  in LTLL (Tukey, all  $p < 0.01$ ) (Figure 1b).  
244 As to *E. huxleyi* RCC1266, compared to HTHL, growth rates decreased by  $33\% \pm 3\%$   
245 in HTLL, by  $48\% \pm 2\%$  in LTHL, and by  $64\% \pm 3\%$  in LTLL (Tukey, all  $p < 0.01$ )  
246 (Figure 1c).

247 The effect of light intensity on cellular Chl *a* content depends on temperature. At  
248 high temperature (HT), decreasing light (LL) intensity increased the Chl *a* content of  
249 *E. huxleyi* PML B92/11 by  $45\% \pm 11\%$  (Tukey,  $p < 0.01$ ) (Figure 1e), and did not

250 significantly affect the Chl *a* contents of *G. oceanica* NIES–1318 and *E. huxleyi*  
251 RCC1266 (Figure 1d, f). At low temperature (LT), decreasing light intensity did not  
252 significantly increase the Chl *a* of three strains (Tukey, all  $p > 0.2$ ) (Figure 1d, e, f).

253

### 254 **3.2 Cellular PIC, POC, PON and POP contents**

255 The effect of light intensity on cellular PIC, POC and PON contents depends on  
256 temperature, which can be seen by comparing these parameters in the high temperature  
257 (HT) regimes with their paired low temperature (LT) regimes (Tables 1, 2; Figure 2).

258 At HT, compared to HL intensity, low light (LL) intensity decreased the PIC contents  
259 by  $38\% \pm 5\%$  for *G. oceanica* NIES–1318 (Tukey,  $p < 0.01$ ) (Figure 2a), by  $29\% \pm$   
260  $19\%$  for *E. huxleyi* PML B92/11 (Tukey,  $p = 0.11$ ) (Figure 2b), by  $23\% \pm 7\%$  for *E.*  
261 *huxleyi* RCC1266 (Tukey,  $p = 0.04$ ) (Figure 2c). However, at LT, decreasing light  
262 intensity increased the PIC contents by  $60\% \pm 11\%$  for *G. oceanica* NIES–1318  
263 (Tukey,  $p < 0.01$ ) (Figure 2a), by  $109\% \pm 32\%$  for *E. huxleyi* RCC1266 (Tukey,  $p =$   
264  $0.04$ ) (Figure 2c).

265 At HT, compared to HL intensity, low light (LL) intensity decreased the POC  
266 contents by  $29\% \pm 4\%$  for *G. oceanica* NIES–1318, by  $39\% \pm 7\%$  for *E. huxleyi*  
267 PML B92/11, and by  $32\% \pm 6\%$  for *E. huxleyi* RCC1266 (all  $p < 0.01$ ) (Figure 2d,e,f).

268 The response of PON contents to low temperature and low light conditions was similar  
269 to that of PIC contents. At HT, compared to HL intensity, LL intensity decreased the  
270 PON contents by  $9\% \pm 10\%$  for *G. oceanica* NIES–1318 ( $p > 0.50$ ) (Figure 2g), by  
271  $19\% \pm 4\%$  for *E. huxleyi* PML B92/11 ( $p < 0.01$ ) (Figure 2h), and by  $19\% \pm 2\%$  for  
272 *E. huxleyi* RCC1266 ( $p = 0.21$ ) (Figure 2i). However, at LT, decreasing light intensity  
273 increased the PON contents by  $31\% \pm 16\%$  for *G. oceanica* NIES–1318 ( $p = 0.12$ )

274 (Figure 2g), by  $29\% \pm 11\%$  for *E. huxleyi* PML B92/11 ( $p = 0.03$ ) (Figure 2h), and by  
275  $50\% \pm 32\%$  for *E. huxleyi* RCC1266 ( $p = 0.12$ ) (Figure 2i). Interestingly, compared  
276 to HTLL, low temperature and low light intensity did not significantly affect the POP  
277 contents of three strains (all  $p > 0.05$ ) (Figure 2j,k,l).

278

### 279 **3.3 PIC : POC, POC : PON, POC: POP and PON : POP ratios**

280 The effects of temperature and light intensity on the PIC : POC ratio are strain-specific  
281 (Table 1; Figure 3). As to *G. oceanica* NIES-1318, compared to HTHL, PIC : POC  
282 ratio didn't be affected significantly in HTLL and LTHL, whereas increased by  $63\% \pm$   
283  $13\%$  in LTLL ( $p < 0.01$ ) (Figure 3a). As to *E. huxleyi* PML B92/11, decreasing  
284 temperature and light intensity did not significantly affect the PIC : POC ratio (Figure  
285 3b) (all  $p > 0.20$ ). As to *E. huxleyi* RCC1266, compared to HTHL, PIC : POC ratio  
286 decreased by  $63\% \pm 6\%$  in LTHL ( $p < 0.01$ ) (Figure 3c).

287 Low temperature and low light intensity acted synergistically to decrease the POC :  
288 PON ratios and POC : POP ratios of three strains, which can be seen by comparing  
289 these parameters under the HTHL treatment with HTLL, LTHL and LTLL treatments  
290 (Figure 3d-i). Compared to HTHL, POC : PON ratio of *G. oceanica* NIES-1318  
291 decreased by  $21\% \pm 9\%$  in HTLL ( $p = 0.07$ ), by  $35\% \pm 5\%$  in LTHL ( $p < 0.01$ ), and  
292 by  $56\% \pm 6\%$  in LTLL ( $p < 0.01$ ) (Figure 3d). As to *E. huxleyi* PML B92/11, compared  
293 to HTHL, POC : PON ratio decreased by 20%–46% in HTLL, LTHL, and LTLL (all  $p$   
294  $< 0.05$ ) (Figure 3e). As to *E. huxleyi* RCC1266, compared to HTHL, POC : PON ratio  
295 decreased by 15%–52% in HTLL ( $p = 0.13$ ), LTHL ( $p = 0.18$ ) and LTLL ( $p < 0.01$ )  
296 (Figure 3f). At HT, decreasing light intensity decreased the POC : POP ratios by 24%–  
297 33% for three strains (all  $p < 0.06$ ) (Figure 3g,h,i). At LT, decreasing light intensity did

298 not significantly affect the POC : POP ratios of three strains (Figure 3g, h, i). Compared  
299 to HL intensity, at HT, low light (LL) intensity did not significantly decrease the PON :  
300 POP ratios of three strains, whereas at LT, it increased the PON : POP ratios by 53%–  
301 57% (Figure 3j,k,l) (both  $p < 0.05$  for *G. oceanica* NIES–1318 and *E. huxleyi* PML  
302 B92/11;  $p = 0.08$  for *E. huxleyi* RCC1266).

303

### 304 **3.4 Cellular carbohydrate and lipid contents**

305 Cellular carbohydrate and lipid contents were mainly affected by light intensity, which  
306 can be seen by comparing these parameters in the HL intensity with their paired LL  
307 intensity (Table 1; Figure 4). Compared to HL intensity, in LL intensity, the  
308 carbohydrate contents were significantly lower for three strains regardless of levels of  
309 temperature for the range used here (Figure 4a,b,c). Compared to HL intensity, at HT,  
310 low light intensity decreased the carbohydrate contents by 80%–83% for three strains  
311 (all  $p < 0.01$ ), and at LT, it decreased the carbohydrate contents by 85%–88% (all  $p <$   
312  $0.01$ ) (Figure 4a,b,c). Similarly, compared to HL intensity, at HT, low light intensity  
313 decreased the lipid contents by 63%–69% of three strains (all  $p < 0.01$ ), and at LT, it  
314 decreased the lipid contents by 76%–85% (all  $p < 0.01$ ) (Figure 4d,e,f).

315

## 316 **4 Discussion**

317 We propose that under low temperature and low light intensity (LTLL),  
318 coccolithophores slow their metabolism, resulting in reduced growth rates and lower  
319 levels of POC, POP, carbohydrates and lipids. Our results reveal a distinct acclimation  
320 strategy: energy conservation is prioritized through an initial reduction in carbohydrate  
321 and lipid content, followed by a subsequent decrease in growth rate (Figure 4). Notably,  
322 carbohydrate and lipid levels were primarily light–dependent, whereas PON (a proxy

323 for protein) was temperature–dependent. Analysis of the POC : PON : POP ratios  
324 showed that POC decreased more steeply than PON, only under high temperature did  
325 POC decline more steeply than POP (Figure 3). Intriguingly, under low temperature,  
326 both POC and POP were insensitive to light, whereas high light intensity inhibited PON.  
327 Collectively, these results indicate that coccolithophores acclimate to LTLL conditions  
328 by precisely regulating their biomolecular composition, elemental stoichiometry and  
329 growth (Zhang et al., 2021).

330

### 331 **Effects of low temperature and light limitation on the elemental stoichiometry and** 332 **macromolecules of coccolithophores**

333 While previous studies observed stable or even increased POC contents at moderate  
334 temperature decreases (e.g., from 18–24 °C down to 14–20 °C) (Feng et al., 2008;  
335 Borchard et al., 2011; Tong et al., 2019; Torres–Romero et al., 2024), our results  
336 demonstrate a significant decline in POC at 9 °C compared to 21 °C (Figure 2). This  
337 discrepancy likely stems from the several inhibitory effect of 9 °C on photosynthetic  
338 carbon fixation and growth rates, which is far more pronounced than the effects seen at  
339 14 °C or 15 °C (Shen et al., 2025b). The stability of POC contents across both light  
340 intensities at 9 °C further supports this threshold effect. Additionally, the broad  
341 temperature and light gradients employed in this study may have overshadowed any  
342 subtle inter–strain variations in POC.

343 Compared to the LTLL condition, the combination of low temperature and high light  
344 (LTHL) led to a threefold increase in carbohydrate and lipid contents, even as total POC  
345 remained relatively stable. This stoichiometric shift implies a reduction in protein  
346 content, a conclusion corroborated by the decline in PON (Figures 2, 4). The reasons  
347 could be that at 9 °C, cellular metabolism is significantly constrained, rendering a PAR

348 of 150  $\mu\text{mol photons m}^{-2} \text{ s}^{-1}$  excessive rather than productive (Jin et al., 2019).  
349 Consequently, the cell reallocates surplus energy into carbohydrates and lipids as a  
350 photoprotective mechanism. This is supported by the significantly lower carbohydrate :  
351 POC and lipid : POC ratios under low light (Figure S2), whereas the higher ratios  
352 observed at low temperature under high light reflect a strategy favoring energy storage  
353 (Zhang et al., 2021). Furthermore, while POC and PON typically exhibit an optimal  
354 irradiance response (Zhang et al., 2015), our data show that high light reduces PON  
355 content at low temperature (Figure 2). This suggests that low temperature depresses the  
356 optimal light threshold for protein synthesis and diminishes high light tolerance (Gafar  
357 et al., 2018). The suppressed Calvin cycle at 9 °C limits carbon fixation, reducing  
358 energy demand and necessitating the downregulation of Chl *a* (Figure 1). Notably,  
359 under high light, cells further downregulate light-harvesting antenna proteins to  
360 prevent the absorption of detrimental excess light, a process that significantly  
361 contributes to the observed decrease in PON (McKew et al., 2013).

362 Interestingly, the combination of low temperature and low light did not significantly  
363 alter the POP content of coccolithophores (Figure 2j–l). This stability may be attributed  
364 to a synchronized metabolic slowdown: while low light limits photosynthetic efficiency,  
365 low temperature suppresses respiratory, leading to a concurrent reduction in both  
366 adenosine triphosphate (ATP) synthesis and overall energy consumption (Jin et al.,  
367 2019; Strzepek et al., 2019). This coordination maintains a dynamic equilibrium  
368 between phosphorus consumption (e.g. for ATP synthesis) and supply (e.g. phosphorus  
369 uptake) (Dyhrman, 2016). Furthermore, as energy-intensive processes like  
370 carbohydrate or lipid synthesis and cell division are inhibited (Figures 4, 1),  
371 coccolithophores prioritize phosphorus allocation toward essential biomolecules.  
372 Specifically, phosphorus is channeled into nucleic acids (DNA or RNA) and membrane

373 phospholipids at the expense of non-essential metabolic pathways (Zhang et al., 2021).  
374 Notably, low temperature—rather than light—appears to be the primary driver for  
375 increased RNA investment, a strategy that preserves core POP pools despite a sluggish  
376 metabolism (Zhang et al., 2021). From an ecological perspective, the resilience of POP  
377 under these stressors may enhance the competitive fitness of coccolithophores in high-  
378 latitude or deep-euphotic environments (Perrin et al., 2016). Given that phosphorus  
379 often limits deep-sea phytoplankton, stable cellular POP levels could influence  
380 zooplankton grazing efficiency, thereby modulating energy transfer and nutrient cycling  
381 within deep-sea ecosystems (Gerecht et al., 2014).

382

383 **Effects of low temperature and light limitation on calcification and growth rate of**  
384 **coccolithophores**

385 While calcification is typically energy-dependent and stimulated by high light under  
386 temperate conditions (Triccas et al., 2025), we observed a counterintuitive reduction in  
387 PIC content under high light during cold stress (Figure 2a–c). This finding challenges  
388 the conventional view that calcification is primarily limited by energy availability under  
389 low light (Zhang et al., 2015). We propose that low temperature (LT) reduces the repair  
390 capacity of photosynthetic machinery, making cells more susceptible to photoinhibition.  
391 This, in turn, likely damages cellular membranes and disrupts the ion transport (e. g.,  
392  $\text{Ca}^{2+}$  or  $\text{HCO}_3^-$ ) and homeostasis essential for calcification (Strzepek et al., 2019;  
393 Triccas et al., 2025). Furthermore, the observed restriction of ribosomal proteins and  
394 the potential downregulation of calcium-binding proteins—despite an abundance of  
395 photosynthetic machinery at low temperatures—may further depress PIC accumulation  
396 (Dedman et al., 2023). From an ecological standpoint, high PIC content serves as a  
397 defense against grazers, while an elevated PIC : POC ratio enhances carbon

398 sedimentation and sequestration in the deep sea (Poulton et al., 2014; Rigual–  
399 Hernández et al., 2020). Notably, the significant strain–specific variation in PIC content  
400 observed here, highlights the phenotypic plasticity that allows coccolithophores to  
401 colonize diverse marine habitats, ranging from sunlit surfaces to the deep euphotic zone  
402 (Rigual–Hernández et al., 2018).

403 Previous studies reported growth rates of *E. huxleyi* ranging from 0.09 d<sup>-1</sup> (strain  
404 CCMP371 at 8.5 °C) to 0.12–0.19 d<sup>-1</sup> (strains RCC1710, RCC1252, and RCC1710 at  
405 6.5 °C) (Rosas–Navarro et al., 2016; Wang et al., 2019). Additionally, PIC contents of  
406 *E. huxleyi* strain CCMP371 were observed at 3.2–4.8 pg cell<sup>-1</sup> at 8.5 °C (Wang et al.,  
407 2019). Synthesizing these findings with our results, we estimate that the growth rates  
408 of the three coccolithophore strains in this study would be approximately 0.1 d<sup>-1</sup> at 4  
409 °C, with PIC contents around 3–4 pg cell<sup>-1</sup>. Notably, the lower latitudinal origin of *G.*  
410 *oceanica* compared to strains RCC1266 and PML B92/11 suggests a superior  
411 adaptation to warmer waters (Buitenhuis et al., 2008). Consequently, *G. oceanica*  
412 exhibits a more pronounced decline in growth rate under cold stress, driving the  
413 observed strain–specific divergence. Furthermore, rising temperatures stimulate PIC  
414 accumulation more effectively in *E. huxleyi* than in *G. oceanica*. As a result, thermal  
415 warming leads to a decreased PIC : POC ratio in *G. oceanica*, whereas the ratio remains  
416 relatively stable in *E. huxleyi*.

417 Under laboratory conditions (9 °C and 15 μmol photons m<sup>-2</sup> s<sup>-1</sup>), the three  
418 coccolithophore strains maintained growth rates of 0.24 to 0.46 d<sup>-1</sup>, equivalent to a  
419 division cycle of approximately 2–3 days. In contrast, within the actual ocean at depths  
420 of 100–200 m, cells may cease division entirely, opting instead to expand light–  
421 harvesting antenna protein or the functional cross–sectional area of PSII reaction  
422 centers to ensure survival (Pierangelini et al., 2015). This strategy preserves their

423 capacity for rapid recovery and reproduction once favorable conditions return. While  
424 our experimental POC, PON, POP and PIC values align closely with the global  
425 averages synthesized by Sheward et al. (2023), the physiological characteristics of  
426 phytoplankton in situ are further reshaped by complex environmental drivers. Because  
427 other environmental factors, such as hydrostatic pressure, nutrient pulses, microbial  
428 interactions, and spectral light quality, can affect these physiological characteristics of  
429 phytoplankton. In the dysphotic zone, high hydrostatic pressure may inhibit tubulin  
430 polymerization and membrane fluidity, thereby suppressing photosynthesis and cell  
431 division (Potts and Friedmann, 1981). Conversely, nutrient pulses provide the essential  
432 substrates for synthesizing key proteins even under depressed metabolic rates (Sui et  
433 al., 2019), while microbial interactions dictate the balance between survival or  
434 decomposition (Zweifel et al., 2025). Furthermore, spectral light quality—specifically  
435 the dominance of blue light at 100–150 m—acts as a critical signal. Coccolithophores  
436 adapt to this “blue light regime” by enriching their antennae with chlorophyll c and  
437 fucoxanthin to maximize absorption efficiency (Shen et al., 2025b). Most notably,  
438 recent findings by Balch et al. (2023) indicate that at depths where light is as low as 2  
439  $\mu\text{mol photons m}^{-2} \text{ s}^{-1}$ , coccolithophores can utilize osmotrophy—the uptake of dissolved  
440 organic carbon (DOC) such as acetate, mannitol and glycerol—to sustain both POC and  
441 PIC production. Although DOC-supported growth rates remain low, this osmotrophic  
442 capability serves as a vital survival strategy under extreme light limitation. Such  
443 mixotrophic behavior underscores that coccolithophore-mediated DOC uptake is a  
444 significant yet underappreciated component of the biological carbon pump (Balch et al.,  
445 2023). Ultimately, the intricate interplay among these physical, chemical, and  
446 biological factors redefines the ecological functions of coccolithophores in the deep  
447 ocean. In addition, the nutrient concentrations in this study exceed typical levels found

448 in the open ocean's surface or subsurface waters. These nutrient-replete conditions  
449 were intentionally maintained to decouple the physiological effects of temperature and  
450 light from nutrient stress. Consequently, when extrapolating our findings to natural  
451 environments, one must account for the potential of nutrient limitation to modulate or  
452 attenuate the observed responses.

453

#### 454 **Implications of low temperature and light limitation on coccolithophores**

455 Our findings demonstrate that three coccolithophore strains maintain calcification  
456 capabilities even under the low-temperature and light-limited conditions of the deep  
457 sea (Figure 2). This persistence suggests that significant carbon export may occur much  
458 deeper in the water column than previously recognized (Malinverno et al., 2003). Such  
459 deep-sea calcification exerts distinct geochemical influences on the marine carbonate  
460 system compared to surface processes, necessitating a comprehensive re-evaluation of  
461 its impacts (Rigual-Hernández et al., 2020). Indeed, overlooking the contribution of  
462 deep-dwelling coccolithophores may lead to a substantial underestimation of global  
463 marine carbonate production (Rigual-Hernández et al., 2018). Beyond biogeochemistry,  
464 investigating the resilience of these organisms under such stressors enhances our  
465 understanding of the physiological limits of photosynthesis and provides critical  
466 insights into life's adaptive strategies in extreme environments (Balch et al., 2023;  
467 Chauhan et al., 2024). In conclusion, the adaptation of coccolithophores to the cold,  
468 dark deep ocean reveals that fundamental biological forces driving global ecosystems  
469 persist even in these seemingly barren reaches (Perrin et al., 2016).

470

471

472

473 **References**

- 474 Balch, W. M., Drapeau, D. T., Poulton, N., Archer, S. D., Cartisano, C., Burnell, C.,  
475 and Godrijan, J.: Osmotrophy of dissolved organic compounds by coccolithophore  
476 populations: Fixation into particulate organic and inorganic carbon, *Sci. Adv.*, 9,  
477 eadf6973, doi: 10.1126/sciadv.adf6973, 2023.
- 478 Beaufort, L., Couapel, M., Buchet, N., and Claustre, H.: Calcite production by  
479 coccolithophores in the South East Pacific Ocean: from desert to jungle,  
480 *Biogeosciences Discuss.*, 4, 3267–3299, doi: 10.5194/bgd-4-3267-2007, 2007.
- 481 Borchard, C., Borges, A. V., Händel, N., and Engel, A.: Biogeochemical response of  
482 *Emiliana huxleyi* (PML B92/11) to elevated CO<sub>2</sub> and temperature under  
483 phosphorus limitation: A chemostat study, *J. Exp. Mar. Biol. Ecol.*, 410, 61–71,  
484 <https://doi.org/10.1016/j.jembe.2011.10.004>, 2011.
- 485 Buitenhuis, E. T., Pangerc, T., Franklin, D. J., Le Quéré, C., and Malin, G.: Growth  
486 rates of six coccolithophorid strains as a function of temperature, *Limnol.*  
487 *Oceanogr.* 53, 1181–1185, doi:10.4319/lo.2008.53.3.1181, 2008.
- 488 Chauhan, N., Barton, S., Zarkogiannis, S., and Rickaby, R. E. M.: Light quality induces  
489 a shift in coccosphere morphology in *Scyphosphaera apsteinii*, *J. Plankton. Res.*,  
490 46, 383–386, doi: 10.1093/plankt/fbae032, 2024.
- 491 Conte, M. H., Sicre, M. A., Rühlemann, C., Weber, J. C., Schulte, S., Schulz–Bull, D.,  
492 and Blanz, T.: Global temperature calibration of the alkenone unsaturation index  
493 (U<sub>37<sup>K</sup></sub>) in surface waters and comparison with surface sediments, *Geochem.*,  
494 *Geophys.*, *Geosys.*, 7, Q02005, doi: 10.1029/2005GC001054, 2006.
- 495 Conte, M. H., Thompson, A., Lesley, D., and Harris, R. P: Genetic and physiological  
496 influences on the alkenone/alkenoate versus growth temperature relationship in  
497 *Emiliana huxleyi* and *Gephyrocapsa oceanica*, *Geochim. Cosmochim. Ac.*, 62,

498 51–68, doi: 10.1016/S0016-7037(97)00327-X, 1998.

499 Dedman, C. J., Barton, S., Fournier, M., and Richaby, R. E. M.: The cellular response  
500 to ocean warming in *Emiliana huxleyi*, *Front. Microbiol.*, 14, 1177349, doi:  
501 10.3389/fmicb.2023.1177349, 2023.

502 Dyhrman, S. T.: Nutrients and their acquisition: phosphorus physiology in microalgae,  
503 in: *The physiology of microalgae*, edited by: Borowitzka, M. A., Beardall, J., and  
504 Raven, J. A., Springer, Heidelberg, Germany, 155–183,  
505 <https://doi.org/10.1007/978-3-319-24945-2>, 2016.

506 Fabry, V. J., and Balch, W. M.: Direct measurements of calcification rates in planktonic  
507 organisms, in: *Guide to best practices for ocean acidification research and data*  
508 *reporting*, edited by Riebesell, U., Fabry, V. J., Hansson, L., and Gattuso, J. P.,  
509 Luxembourg, Publications Office of the European Union, 201–212,  
510 <https://doi.org/10.2777/66906>, 2010.

511 Feng, Y., Warner, M. E., Zhang, Y., Sun, J., Fu, F., Rose, J. M., and Hutchins, D. A.:  
512 Interactive effects of increased pCO<sub>2</sub>, temperature and irradiance on the marine  
513 coccolithophore *Emiliana huxleyi* (Prymnesiophyceae), *Eur. J. Phycol.*, 43, 87–  
514 98, <https://doi.org/10.1080/09670260701664674>, 2008.

515 Gafar, N. A., Eyre, B. D., and Schulz, K. G.: A conceptual model for projecting  
516 coccolithophorid growth, calcification and photosynthetic carbon fixation rates in  
517 response to global ocean change, *Front. Mar. Sci.*, 4, 433, doi:  
518 10.3389/fmars.2017.00433, 2018.

519 Gerecht, A. C., Šupraha, L., Edvardsen, B., Probert, I., and Henderiks, J.: High  
520 temperature decreases the PIC / POC ratio and increases phosphorus requirements  
521 in *Coccolithus pelagicus* (Haptophyta), 11, 3531–3545, doi: 10.5194/bg-11-3531-  
522 2014, 2014.

523 Guillard, R. R. L., and Ryther, J. H.: Studies of marine planktonic diatoms. I. *Cyclotella*  
524 *nana* Hustedt and *Detonula confervacea* Cleve. *Can. J. Microbiol.*, 8, 229–239,  
525 doi:10.1139/m62-029, 1962.

526 Hernández–Almeida, I., Krumhardt K. M., Zhang H., and Stoll H. M.: Estimation of  
527 physiological factors controlling carbon isotope fractionation in coccolithophores  
528 in photic zone and core–top samples, *Geochem. Geophys. Geosy.*, 21,  
529 e2020GC009272, doi: 10.1029/2020GC009272, 2020.

530 Horváth, G., and Varjú, D.: Polarized light in animal vision: polarization patterns in  
531 nature, Springer, Berlin, 319–324, <https://doi.org/10.1007/978-3-662-09387-0>, 2004.

532 Jin, P., Liu, N., and Gao, K.: Physiological responses of a coccolithophore to multiple  
533 environmental drivers, *Mar. Pollut. Bull.*, 146, 225–235,  
534 doi:10.1016/j.marpolbul.2019.06.032, 2019.

535 Jordan, R. W., and Winter, A.: Assemblages of coccolithophorids and other living  
536 microplankton off the coast of Puerto Rico during January–May 1995, *Mar.*  
537 *Micropaleontol.*, 39, 113–130, doi: 10.1016/S0377-8398(00)00017-7, 2000.

538 Li, S., Zhu, J., Jin, X., Feng, Y., Jiao, N., and Zhang, W.: Multifaceted contributions of  
539 coccolithophores to ocean carbon export, *Ocean-Land-Atmos. Res.*, 3,  
540 Article0049, doi: 10.34133/olar.0049, 2024.

541 Malinverno, E., Ziveri, P., and Corselli, C.: Coccolithophorid distribution in the Ionian  
542 Sea and its relationship to eastern Mediterranean circulation during late fall to  
543 early winter 1997, *J. Geophys. Res.*, 108(C9), 8115, doi: 10.1029/2002JC001346,  
544 2003.

545 Masuko, T., Minami, A., Iwasaki, N., Majima, T., Nishimura, S. I., and Lee, Y. C.:  
546 Carbohydrate analysis by a phenolsulfuric acid method in microplate format, *Anal.*  
547 *Biochem.*, 339, 69–72. doi:10.1016/j.ab.2004.12.001, 2005.

548 McKew, B. A., Lefebvre, S. C., Achterberg, E. P., Metodieva, G., Raines, C. A.,  
549 Metodiev, M. V., and Geider, R. J.: Plasticity in the proteome of *Emiliana huxleyi*  
550 CCMP 1516 to extremes of light is highly targeted, *New Phytol.*, 200, 61–73, doi:  
551 10.1111/nph.12352, 2013.

552 Pakulski, J. D., and Benner, R.: An improved method for the hydrolysis and MBTH  
553 analysis of dissolved and particulate carbohydrates in seawater, *Mar. Chem.*, 40,  
554 143–160, doi:10.1016/0304-4203(92)90020-B, 1992.

555 Perrin, L., Probert, I., Langer, G., and Aloisi, G.: Growth of the coccolithophore  
556 *Emiliana huxleyi* in light- and nutrient-limited batch reactors: relevance for the  
557 BIOSOPE deep ecological niche of coccolithophores, *Biogeosciences*, 13, 5983–  
558 6001, doi: 10.5194/bg-13-5983-2016, 2016.

559 Petrou, K., Kranz, S. A., Trimborn, S., Hassler, C. S., Ameijeiras, S. B., Sackett, O.,  
560 Ralph, P. J., and Davidson, A. T.: Southern Ocean phytoplankton physiology in a  
561 changing climate, *J. Plant Physiol.*, 203, 135–150, doi:  
562 10.1016/j.jplph.2016.05.004, 2016.

563 Pierangelini, M., Stojkovic, S., Orr, P. T., and Beardall J.: Photo-acclimation to low  
564 light—Changes from growth to antenna size in the cyanobacterium  
565 *Cylindrospermopsis raciborskii*, *Harmful Algae*, 46, 11–17, doi:  
566 10.1016/j.hal.2015.04.004, 2015.

567 Potts, M., and Friedmann, E.: Effects of water stress on cryptoendolithic cyanobacteria  
568 from hot desert rocks, *Arch Microbiol.*, 130, 267–271, doi: 10.1007/BF00425938,  
569 1981.

570 Poulton, A. J., Stinchcombe, M. C., Achterberg, E. P., Bakker, D. C. E., Dumousseaud,  
571 C., Lawson, H. E., Lee, G. A., Richier, S., Suggett, D. J., and Young, J. R.:  
572 Coccolithophores on the north–west European shelf: calcification rates and

573 environmental controls, *Biogeosciences*, 11, 3919–3940, doi: 10.5194/bg-11-  
574 3919-2014, 2014.

575 R Core Team: The R foundation for statistical computing platform, x86\_64-w64-  
576 mingw32/x64, available at: <https://cran.r-project.org/bin/windows/base/old/3.5.0/>  
577 (28 February 2020), 2018.

578 Rigual–Hernández, A. S., Trull, T. W., Nodder, S. D., Flores, J. A., Bostock, H.,  
579 Abrantes, F., Eriksen, R. S., Sierro, F. J., Davies, D. M., Ballegeer, A. M., Fuertes,  
580 M. A., and Northcote, L. C.: Coccolithophore biodiversity controls carbonate  
581 export in the Southern Ocean, *Biogeosciences*, 17, 245–263, 2020.

582 Rigual–Hernández, A., Flores, J. A., Sierro, F. J., Fuertes, M. A., Cros, L., and Trull, T.  
583 W.: Coccolithophore populations and their contribution to carbonate export during  
584 an annual cycle in the Australian section of the Antarctic zone, *Biogeosciences*, 15,  
585 1843–1862, doi: 10.5194/bg-15-1843-2018, 2018.

586 Ritchie, R. J.: Consistent sets of spectrophotometric chlorophyll equations for acetone,  
587 methanol and ethanol solvents, *Photosynth Res.*, 89, 27–41, doi: 10.1007/s11120-  
588 006-9065-9, 2006.

589 Rosas–Navarro, A., Langer, G., and Ziveri, P.: Temperature affects the morphology and  
590 calcification of *Emiliania huxleyi* strains, *Biogeosciences*, 13, 2913–2926, doi:  
591 10.5194/bg-13-2913-2016, 2016.

592 Sage, R. F.: Variation in the  $k_m$  of Rubisco in C3 and C4 plants and some implications  
593 for photosynthetic performance at high and low temperature, *J. Experimental*  
594 *Botany*, 53: 609–620, doi: 10.1016/j.jplph.2016.05.004, 2016.

595 Shen, L., Ren, F., Wang, Y. C., Li, Z., Zheng, M., Li, X., Fan, W., Yang, Y., Sang, M.,  
596 Liu, C. Han, G., Qin, S., Fan, J., Tian, L., Kuang, T., Shen, J. R., and Wang, W.:  
597 Structure and function of a huge photosystem I-fucoxanthin chlorophyll

598 supercomplex from a coccolithophore, *Science*, 389, eadv2132, doi:  
599 10.1126/science.adv2132, 2025a.

600 Shen, Y., Jiang, R., Chang, J., Cai, L., Zhu, Y., Yin, Y., Shao, L., Wu, M., Zhang, J., and  
601 He, P.: The effect of temperature on the photosynthetic carbon fixation efficiency  
602 of sessile macroalgae in the mussel farming area of Guoqi Island through stable  
603 isotope, *Mar. Environ. Res.*, 209, 107190, doi: 10.1016/j.marenvres.2025.107190,  
604 2025b.

605 Sheward, R. M., Liefer, J. D., Irwin, A. J., and Finkel, Z. V.: Elemental stoichiometry  
606 of the key calcifying marine phytoplankton *Emiliana huxleyi* under ocean climate  
607 change: A meta-analysis, *Glob. Change Biol.*, 29, 4259–4278,  
608 doi:10.1111/gcb.16807, 2023.

609 Skeffington, A., Fischer, A., Sviben, S., Brzezinka, M., Górka, M., Bertinetti, L.,  
610 Woehle, C., Huettel, B., Graf, A., and Scheffel, A.: A joint proteomic and genomic  
611 investigation provides insights into the mechanism of calcification in  
612 coccolithophores, *Nature Commun.*, 24, 3749, doi: 10.1038/s41467-023-39336-1

613 Solorzano, L., and Sharp, J. H.: Determination of total dissolved phosphorus and  
614 particulate phosphorus in nature waters, *Limnol. Oceanogr.*, 25, 754–758,  
615 doi:10.4319/lo.1980.25.4.0754, 1980.

616 Strzepek, R. F., Boyd, P. W., and Sunda, W. G.: Photosynthetic adaptation to low iron,  
617 light, and temperature in Southern Ocean phytoplankton, *Proc. Nat. Acad. Sci. U.*  
618 *S.*, 116, 4388–4393, doi: 10.1073/pnas.1810886116, 2019.

619 Sui, Y., Muys, M., Van de Waal, D. B., D’Adamo, S., Vermeir, P., Fernandes, T. V., and  
620 Vlaeminck, S. E.: Enhancement of co-production of nutritional protein and  
621 carotenoids in *Dunaliella salina* using a two-phase cultivation assisted by nitrogen  
622 level and light intensity, *Bioresour. Technol.*, 287, 121398,

623 <http://doi.org/10.1016/j.biortech.2019.121398>, 2019.

624 Tong, S., Hutchins, D. A., and Gao, K.: Physiological and biochemical responses of  
625 *Emiliana huxleyi* to ocean acidification and warming are modulated by UV  
626 radiation, *Biogeosciences*, 16, 561–572, <https://doi.org/10.5194/bg-16-561-2019>,  
627 2019.

628 Torres–Romero, I., Clark, A. J., Wijker, R. S., Jaggi, M., Zhang, H., and Stoll, H. M.:  
629 Temperature–dependent carbon isotope fractionation in coccolithophores, *Front.*  
630 *Earth Sci.*, 12, 1331179, doi: 10.3389/feart.2024.1331179, 2024.

631 Triccas, A., Chevrier, D. M., Verezhak, M., Ihli, J., Guizar-Sicairos, M., Holler, M.,  
632 Scheffel, A., Ozaki, N., Chamard, V., Wood, R., Grünewald, T. A., and Nudelman,  
633 F.: Dynamic change of calcium-rich compartments during coccolithophore  
634 biomineralization, *Sci. Adv.*, 11, eadv0618, doi: 10.1126/sciadv.adv0618, 2025.

635 Wang, D., Gao, X., Wang, X., Yuan, X., Guo, X., Zhang, Y., Xu, K., and Li, Z.: Diverse  
636 thermal responses of the growth, photosynthesis, lipid and fatty acids in the  
637 terrestrial oil–producing microalga *Vischeria* sp. WL1, *J. Appl. Phycol.*, 36, 29–  
638 39, doi:10.1007/s10811-023-03152-3, 2024.

639 Wang, X., Fu, F., Qu, P., Kling, J. D., Jiang, H., Gao, Y., and Hutchins, D. A.: How will  
640 the key marine calcifier *Emiliana huxleyi* respond to a warmer and more thermally  
641 variable ocean? *Biogeosciences*, 16, 4393–4409, doi: 10.5194/bg-16-4393-2019,  
642 2019.

643 Xu, J., Li, T., Li, C. L., Zhu, S. N., Wang, Z. M., and Zeng, E. Y.: Lipid accumulation  
644 and eicosapentaenoic acid distribution in response to nitrogen limitation in  
645 microalga *Eustigmatos vischeri* JHsu-01 (Eustigmatophyceae), *Algal Res.*, 48,  
646 101910, doi: 10.1016/j.algal.2020.101910, 2020.

647 Young, J. N., Goldman, J. A. L., Kranz, S. A., Tortell, P. D., and Morel, F. M. M.: Slow

648 carboxylation of Rubisco constrains the rate of carbon fixation during Antarctic  
649 phytoplankton blooms, *New Phytol.*, 205, 172–181, doi: 10.1111/nph.13021, 2015.

650 Young, J. R., Davis, S. A., Bown, P. R., and Mann, S.: Coccolith ultrastructure and  
651 biomineralisation, *J. Struct. Biol.*, 126, 195–215, doi: 10.1006/jsbi.1999.4132,  
652 1999.

653 Zhang, Y., and Gao, K.: Photosynthesis and calcification of the coccolithophore  
654 *Emiliana huxleyi* are more sensitive to changed levels of light and CO<sub>2</sub> under  
655 nutrient limitation, *J. Photochem. Photobiol. B: Biol.*, 217, 112145, doi:  
656 10.1016/j.jphotobiol.2021.112145, 2021.

657 Zhang, Y., Bach, L. T., Schulz, K. G., and Riebesell, U.: The modulating effect of light  
658 intensity on the response of the coccolithophore *Gephyrocapsa oceanica* to ocean  
659 acidification, *Limnol. Oceanogr.*, 60, 2145–2157, doi: 10.1002/lno.10161, 2015.

660 Zhang, Y., Collins, S., and Gao, K.: Reduced growth with increased quotas of  
661 particulate organic and inorganic carbon in the coccolithophore *Emiliana huxleyi*  
662 under future ocean climate change conditions, *Biogeosciences*, 17, 6357–6375,  
663 doi:10.5194/bg-17-6357-2020, 2020.

664 Zhang, Y., Li, Z., Schulz, K. G., Hu, Y., Irwin, A. J., and Finkel, Z. V.: Growth-  
665 dependent changes in elemental stoichiometry and macromolecular allocation in  
666 the coccolithophore *Emiliana huxleyi* under different environmental conditions,  
667 *Limnol. Oceanogr.*, 66, 2999–3009, doi: 10.1002/lno.11854, 2021.

668 Zweifel, S. T., Henshaw, R. J., Müller, O., Keegstra, J. M., Charlton, S. G. V., Pioli, R.,  
669 Martínez-Pérez, C., Alcolombri, U., Clerc, E., and Stocker, R.: Bacteria induce an  
670 amoeboid phase in coccolithophores that persists after bloom collapse, *Sci. Adv.*,  
671 11, eadw7280, <http://doi.org/10.1126/sciadv.adw7280>, 2025.

672

673 *Data availability.* The data are available upon request to the corresponding author  
674 (Yong Zhang)

675

676 *Author contributions.* YZ and JS designed the experiment. YW performed the  
677 experiment. WK and JS analyzed the data and wrote the first manuscript. All authors  
678 improved and reviewed the manuscript. JS, WK and YW contributed equally to this  
679 work.

680

681 *Competing interests.* The authors declare that they have no conflict of interest.

682

683 *Financial support.* This study was supported by the National Natural Science  
684 Foundation of China (No. 32270397), Natural Science Foundation of Xinjiang Uygur  
685 Autonomous Region (No. 202501A54), the Xinjiang Normal University Landmark  
686 Achievements Cultivation Project (XJNUZBS2401), the Tianchi Talent Program in  
687 Xinjiang Uyghur Autonomous Region, and by Hubei Provincial Department of  
688 Education Scientific Research Plan Guidance Project (B2019435), China; Natural  
689 Science Foundation of Fujian Province (2023J01290), China; and the “GeoX”  
690 Interdisciplinary, Research Funds for the Frontiers Science Center for Critical Earth  
691 Material Cycling, Nanjing University (020614380194), China.

692

693

694

695

696

697

698 **Figure Legends**

699 **Figure 1.** Under the treatments of low temperature (LT, 9 °C) and low light (LL, 15  
700  $\mu\text{mol photons m}^{-2} \text{s}^{-1}$ ), LTHL (9 °C, 150  $\mu\text{mol photons m}^{-2} \text{s}^{-1}$ ), HTLL (21 °C, 15  $\mu\text{mol}$   
701  $\text{photons m}^{-2} \text{s}^{-1}$ ) and HTHL (21 °C, 150  $\mu\text{mol photons m}^{-2} \text{s}^{-1}$ ), growth rates and cellular  
702 contents of chlorophyll *a* of *Gephyrocapsa oceanica* NIES–1318, *Emiliania huxleyi*  
703 PML B92/11 and *E. huxleyi* RCC1266. Data are presented as mean  $\pm$  standard deviation  
704 for three replicates ( $n = 3$ ). Different letters (a, b, c, d) represent significant differences  
705 between treatments (Tukey,  $p < 0.05$ ).

706

707 **Figure 2.** Under the treatments of low temperature (LT, 9 °C) and low light (LL, 15  
708  $\mu\text{mol photons m}^{-2} \text{s}^{-1}$ ), LTHL (9 °C, 150  $\mu\text{mol photons m}^{-2} \text{s}^{-1}$ ), HTLL (21 °C, 15  $\mu\text{mol}$   
709  $\text{photons m}^{-2} \text{s}^{-1}$ ) and HTHL (21 °C, 150  $\mu\text{mol photons m}^{-2} \text{s}^{-1}$ ), cellular contents of  
710 particulate inorganic carbon (PIC), particulate organic carbon (POC), particulate  
711 organic nitrogen (PON), particulate organic phosphorus (POP) of *Gephyrocapsa*  
712 *oceanica* NIES–1318, *Emiliania huxleyi* PML B92/11 and *E. huxleyi* RCC1266. Data  
713 are presented as mean  $\pm$  standard deviation for three replicates ( $n = 3$ ). Different letters  
714 (a, b, c, d) represent significant differences between treatments (Tukey,  $p < 0.05$ ).

715

716 **Figure 3.** Under the treatments of low temperature (LT, 9 °C) and low light (LL, 15  
717  $\mu\text{mol photons m}^{-2} \text{s}^{-1}$ ), LTHL (9 °C, 150  $\mu\text{mol photons m}^{-2} \text{s}^{-1}$ ), HTLL (21 °C, 15  $\mu\text{mol}$   
718  $\text{photons m}^{-2} \text{s}^{-1}$ ) and HTHL (21 °C, 150  $\mu\text{mol photons m}^{-2} \text{s}^{-1}$ ), the ratios of PIC : POC,  
719 POC : PON, POC : POP, PON : POP of *Gephyrocapsa oceanica* NIES–1318, *Emiliania*  
720 *huxleyi* PML B92/11 and *E. huxleyi* RCC1266. Data are presented as mean  $\pm$  standard  
721 deviation for three replicates ( $n = 3$ ). Different letters (a, b, c) represent significant  
722 differences between treatments (Tukey,  $p < 0.05$ ).

723

724 **Figure 4.** Under the treatments of low temperature (LT, 9 °C) and low light (LL, 15  
725  $\mu\text{mol photons m}^{-2} \text{ s}^{-1}$ ), LTHL (9 °C, 150  $\mu\text{mol photons m}^{-2} \text{ s}^{-1}$ ), HTLL (21 °C, 15  $\mu\text{mol}$   
726  $\text{photons m}^{-2} \text{ s}^{-1}$ ) and HTHL (21 °C, 150  $\mu\text{mol photons m}^{-2} \text{ s}^{-1}$ ), cellular contents of  
727 carbohydrate and lipid of *Gephyrocapsa oceanica* NIES–1318, *Emiliana huxleyi* PML  
728 B92/11 and *E. huxleyi* RCC1266. Data are presented as mean  $\pm$  standard deviation for  
729 three replicates (n = 3). Different letters (a, b, c) represent significant differences  
730 between treatments (Tukey,  $p < 0.05$ ).

731

732 **Figure S1.** Under the treatments of low temperature (LT, 9 °C) and low light (LL, 15  
733  $\mu\text{mol photons m}^{-2} \text{ s}^{-1}$ ), LTHL (9 °C, 150  $\mu\text{mol photons m}^{-2} \text{ s}^{-1}$ ), HTLL (21 °C, 15  $\mu\text{mol}$   
734  $\text{photons m}^{-2} \text{ s}^{-1}$ ) and HTHL (21 °C, 150  $\mu\text{mol photons m}^{-2} \text{ s}^{-1}$ ), growth curves of  
735 *Gephyrocapsa oceanica* NIES–1318, *Emiliana huxleyi* PML B92/11 and *E. huxleyi*  
736 RCC1266. Data are presented as mean  $\pm$  standard deviation for three replicates (n = 3).

737

738 **Figure S2.** Under the treatments of low temperature (LT, 9 °C) and low light (LL, 15  
739  $\mu\text{mol photons m}^{-2} \text{ s}^{-1}$ ), LTHL (9 °C, 150  $\mu\text{mol photons m}^{-2} \text{ s}^{-1}$ ), HTLL (21 °C, 15  $\mu\text{mol}$   
740  $\text{photons m}^{-2} \text{ s}^{-1}$ ) and HTHL (21 °C, 150  $\mu\text{mol photons m}^{-2} \text{ s}^{-1}$ ), the ratios of  
741 carbohydrate : POC and lipid : POC of *Gephyrocapsa oceanica* NIES–1318, *Emiliana*  
742 *huxleyi* PML B92/11 and *E. huxleyi* RCC1266. Data are presented as mean  $\pm$  standard  
743 deviation for three replicates (n = 3). Different letters (a, b, c) represent significant  
744 differences between treatments (Tukey,  $p < 0.05$ ).

745

746

747

748 **Table 1.** Temperature (9 and 15 °C), light intensity (\*, 15 and 150  $\mu\text{mol photons m}^{-2} \text{s}^{-1}$ ),  
749 growth rate ( $\mu$  in  $\text{d}^{-1}$ ), and cellular contents ( $\text{pg cell}^{-1}$ ) of chlorophyll (Chl) *a*, PIC,  
750 POC, PON and POP, the ratios of PIC : POC, POC : PON, POC : POP, and PON : POP,  
751 as well as carbohydrate (Carbo) and lipid contents ( $\text{pg cell}^{-1}$ ). The values are expressed  
752 as the mean  $\pm$  standard deviations in the brackets of three replicates.

|              |      | <i>G. oceanica</i> |             | <i>E. huxleyi</i> |             | <i>E. huxleyi</i> |             |
|--------------|------|--------------------|-------------|-------------------|-------------|-------------------|-------------|
|              |      | NIES-1318          |             | PML B92/11        |             | RCC1266           |             |
|              |      | 15*                | 150         | 15                | 150         | 15                | 150         |
| $\mu$        | 9°C  | 0.24(0.04)         | 0.67(0.01)  | 0.46(0.04)        | 0.60(0.01)  | 0.45(0.03)        | 0.65(0.02)  |
|              | 21°C | 0.85(0.03)         | 1.29(0.01)  | 0.79(0.01)        | 1.26(0.02)  | 0.84(0.04)        | 1.25(0.01)  |
| Chl <i>a</i> | 9°C  | 0.30(0.04)         | 0.25(0.01)  | 0.25(0.02)        | 0.23(0.02)  | 0.30(0.07)        | 0.24(0.03)  |
|              | 21°C | 0.34(0.05)         | 0.33(0.01)  | 0.39(0.02)        | 0.27(0.03)  | 0.32(0.06)        | 0.30(0.03)  |
| PIC          | 9°C  | 4.29(0.51)         | 2.69(0.38)  | 4.38(1.19)        | 3.39(1.01)  | 4.10(1.11)        | 1.99(0.66)  |
|              | 21°C | 4.94(0.25)         | 8.01(0.40)  | 7.01(2.09)        | 9.82(0.37)  | 10.91(1.53)       | 14.18(1.35) |
| POC          | 9°C  | 10.41(0.68)        | 12.01(1.09) | 10.32(0.78)       | 11.78(0.86) | 9.67(0.97)        | 11.78(0.78) |
|              | 21°C | 22.64(2.27)        | 31.74(1.32) | 21.21(1.49)       | 34.63(1.62) | 21.45(3.10)       | 31.31(1.59) |
| PON          | 9°C  | 4.71(0.62)         | 3.60(0.05)  | 3.09(0.29)        | 2.40(0.32)  | 3.40(0.85)        | 2.26(0.12)  |
|              | 21°C | 5.65(0.80)         | 6.21(0.30)  | 4.55(0.11)        | 5.60(0.15)  | 4.17(0.44)        | 5.14(0.51)  |
| POP          | 9°C  | 0.39(0.11)         | 0.46(0.04)  | 0.38(0.03)        | 0.45(0.04)  | 0.38(0.07)        | 0.39(0.01)  |
|              | 21°C | 0.51(0.08)         | 0.53(0.03)  | 0.50(0.05)        | 0.54(0.06)  | 0.45(0.06)        | 0.50(0.02)  |
| PIC:POC      | 9°C  | 0.41(0.05)         | 0.23(0.03)  | 0.42(0.10)        | 0.29(0.08)  | 0.42(0.08)        | 0.17(0.05)  |
|              | 21°C | 0.22(0.02)         | 0.25(0.02)  | 0.33(0.10)        | 0.28(0.02)  | 0.51(0.05)        | 0.46(0.06)  |
| POC:PON      | 9°C  | 2.60(0.21)         | 3.89(0.36)  | 3.94(0.66)        | 5.75(0.33)  | 3.45(0.83)        | 6.09(0.54)  |
|              | 21°C | 4.74(0.84)         | 5.97(0.42)  | 5.45(0.51)        | 7.23(0.52)  | 5.98(0.32)        | 7.13(0.42)  |
| POC:POP      | 9°C  | 72.1(18.7)         | 67.9(3.2)   | 71.1(10.3)        | 68.0(3.0)   | 65.8(6.5)         | 77.9(5.0)   |
|              | 21°C | 116.9(23.4)        | 154.6(1.5)  | 111.3(16.8)       | 165.5(12.7) | 122.5(5.7)        | 163.3(14.1) |
| PON:POP      | 9°C  | 27.80(6.76)        | 17.54(1.67) | 18.09(0.39)       | 11.86(0.67) | 19.81(5.09)       | 12.82(0.66) |
|              | 21°C | 24.62(0.52)        | 25.98(2.05) | 20.36(1.58)       | 23.05(3.16) | 20.49(0.58)       | 22.99(2.83) |
| Carbo        | 9°C  | 0.37(0.03)         | 3.01(0.07)  | 0.41(0.08)        | 2.65(0.14)  | 0.38(0.06)        | 2.98(0.05)  |
|              | 21°C | 0.98(0.05)         | 5.66(0.16)  | 1.10(0.37)        | 5.43(0.58)  | 0.97(0.15)        | 5.18(0.21)  |
| Lipid        | 9°C  | 1.38(0.24)         | 8.07(0.33)  | 1.03(0.11)        | 4.36(0.79)  | 0.87(0.09)        | 6.42(2.02)  |
|              | 21°C | 4.17(0.21)         | 13.37(0.62) | 4.23(0.20)        | 12.12(0.57) | 4.69(0.36)        | 12.82(0.39) |

753

754

755

756

757

758

759

760

761

762

763 **Table 2.** Results of two-way ANOVAs of the impacts of temperature (T), light intensity  
 764 (L) and their interaction (T×L) on growth rate ( $\mu$ ), chlorophyll (Chl) *a*, PIC, POC, PON  
 765 and POP contents, PIC : POC ratio, POC : PON ratio, POC : POP ratio, PON : POP  
 766 ratio, as well as carbohydrate (Carbo) and lipid contents.

|              | Factor | <i>G. oceanica</i><br>NIES-1318 |                | <i>E. huxleyi</i> PML<br>B92/11 |                | <i>E. huxleyi</i> RCC1266 |                |
|--------------|--------|---------------------------------|----------------|---------------------------------|----------------|---------------------------|----------------|
|              |        | <i>F</i> value                  | <i>p</i> value | <i>F</i> value                  | <i>p</i> value | <i>F</i> value            | <i>p</i> value |
| $\mu$        | T      | 1950.0                          | <0.001         | 1362.4                          | <0.001         | 1006.3                    | <0.001         |
|              | L      | 991.0                           | <0.001         | 518.8                           | <0.001         | 384.8                     | <0.001         |
|              | T×L    | 0.16                            | =0.702         | 161.5                           | <0.001         | 45.60                     | <0.001         |
| Chl <i>a</i> | T      | 11.9                            | =0.009         | 66.6                            | <0.001         | 3.6                       | =0.094         |
|              | L      | 2.9                             | =0.128         | 39.4                            | <0.001         | 1.5                       | =0.261         |
|              | T×L    | 1.5                             | =0.254         | 18.3                            | =0.003         | 0.2                       | =0.669         |
| PIC          | T      | 168.6                           | <0.001         | 35.6                            | <0.001         | 185.2                     | <0.001         |
|              | L      | 10.2                            | =0.013         | 1.4                             | =0.267         | 0.7                       | =0.427         |
|              | T×L    | 103.2                           | <0.001         | 6.3                             | =0.037         | 14.9                      | =0.005         |
| POC          | T      | 358.7                           | <0.001         | 552.6                           | <0.001         | 215.3                     | <0.001         |
|              | L      | 40.2                            | <0.001         | 107.4                           | <0.001         | 31.4                      | <0.001         |
|              | T×L    | 19.8                            | =0.002         | 69.4                            | <0.001         | 13.2                      | =0.007         |
| PON          | T      | 34.1                            | <0.001         | 289.8                           | <0.001         | 33.9                      | <0.001         |
|              | L      | 0.8                             | =0.397         | 1.8                             | =0.221         | 0.1                       | 0.793          |
|              | T×L    | 7.5                             | =0.025         | 40.2                            | <0.001         | 11.3                      | =0.010         |
| POP          | T      | 5.4                             | =0.049         | 15.1                            | =0.005         | 9.6                       | =0.015         |
|              | L      | 1.1                             | =0.324         | 4.4                             | =0.068         | 0.8                       | =0.394         |
|              | T×L    | 0.3                             | =0.618         | 0.2                             | =0.673         | 0.5                       | =0.516         |
| PIC : POC    | T      | 19.5                            | =0.002         | 0.9                             | =0.360         | 26.9                      | =0.001         |
|              | L      | 17.2                            | =0.003         | 3.8                             | =0.086         | 17.8                      | =0.003         |
|              | T×L    | 35.4                            | <0.001         | 0.9                             | =0.379         | 7.3                       | =0.027         |
| POC : PON    | T      | 50.5                            | <0.001         | 25.2                            | =0.001         | 30.6                      | =0.001         |
|              | L      | 18.2                            | =0.003         | 36.1                            | <0.001         | 34.4                      | <0.001         |
|              | T×L    | 0.1                             | =0.917         | 0.1                             | =0.961         | 5.3                       | =0.050         |
| POC : POP    | T      | 57.0                            | <0.001         | 101.8                           | <0.001         | 203.7                     | <0.001         |
|              | L      | 3.7                             | =0.090         | 14.1                            | =0.006         | 28.2                      | =0.001         |
|              | T×L    | 5.8                             | =0.043         | 17.6                            | =0.003         | 8.3                       | =0.020         |
| PON : POP    | T      | 1.6                             | =0.245         | 41.5                            | <0.001         | 10.2                      | =0.013         |
|              | L      | 4.5                             | =0.067         | 2.9                             | =0.128         | 1.7                       | =0.223         |
|              | T×L    | 7.6                             | =0.024         | 18.3                            | =0.003         | 7.8                       | =0.023         |
| Carbo        | T      | 941.5                           | <0.001         | 73.1                            | <0.001         | 316.3                     | <0.001         |
|              | L      | 4773.8                          | <0.001         | 262.8                           | <0.001         | 1896.6                    | <0.001         |
|              | T×L    | 370.3                           | <0.001         | 26.5                            | =0.001         | 105.7                     | <0.001         |
| Lipid        | T      | 333.3                           | <0.001         | 359.6                           | <0.001         | 71.7                      | <0.001         |

|     |        |        |       |        |       |        |
|-----|--------|--------|-------|--------|-------|--------|
| L   | 1281.1 | <0.001 | 377.7 | <0.001 | 128.6 | <0.001 |
| T×L | 32.1   | <0.001 | 62.3  | <0.001 | 4.6   | =0.065 |

---

767

768

769

770

771

772

773

774

775

776

777

778

779

780

781

782

783

784

785

786

787

788

789

790

791

792

793

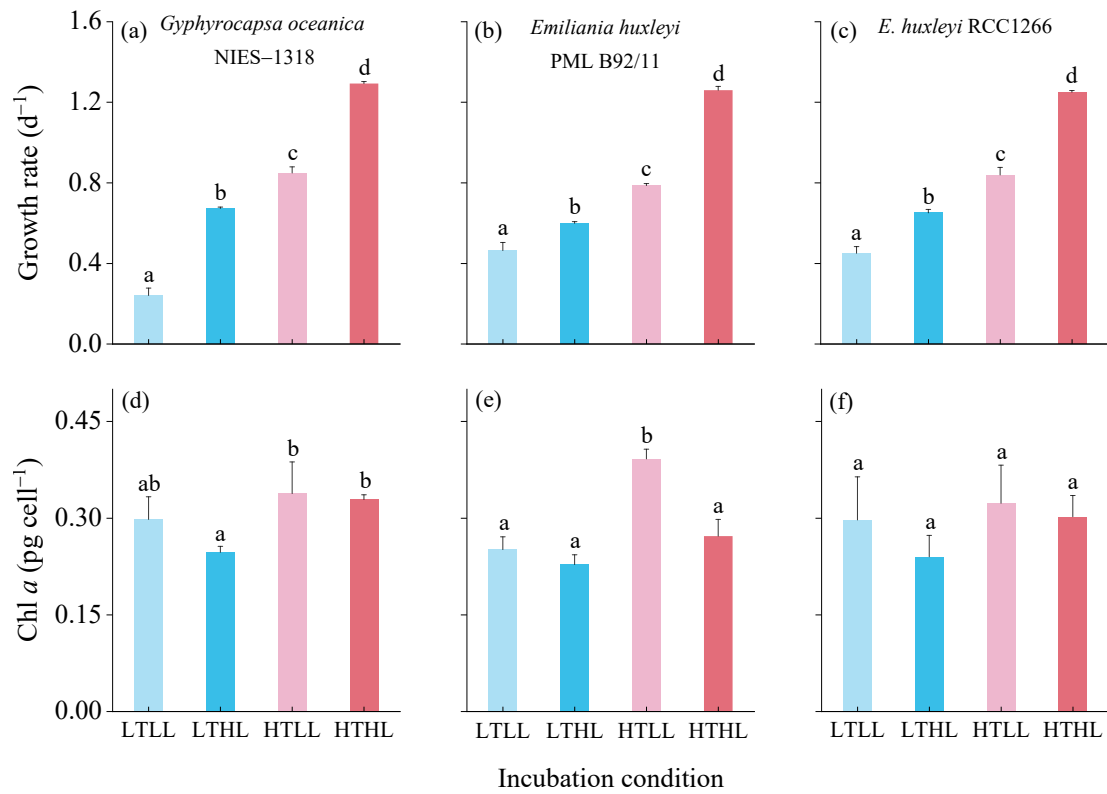

794

795

796

797

798 **Figure 1**

799

800

801

802

803

804

805

806

807

808

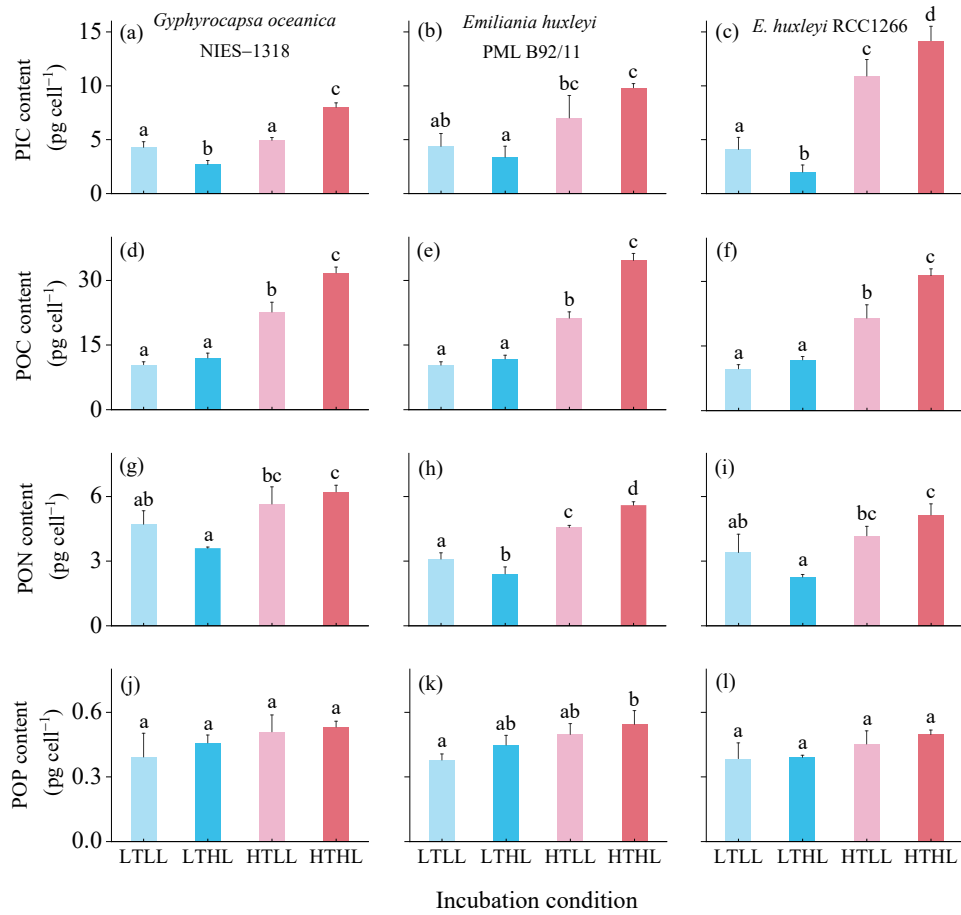

809

810

811

812

813 **Figure 2**

814

815

816

817

818

819

820

821

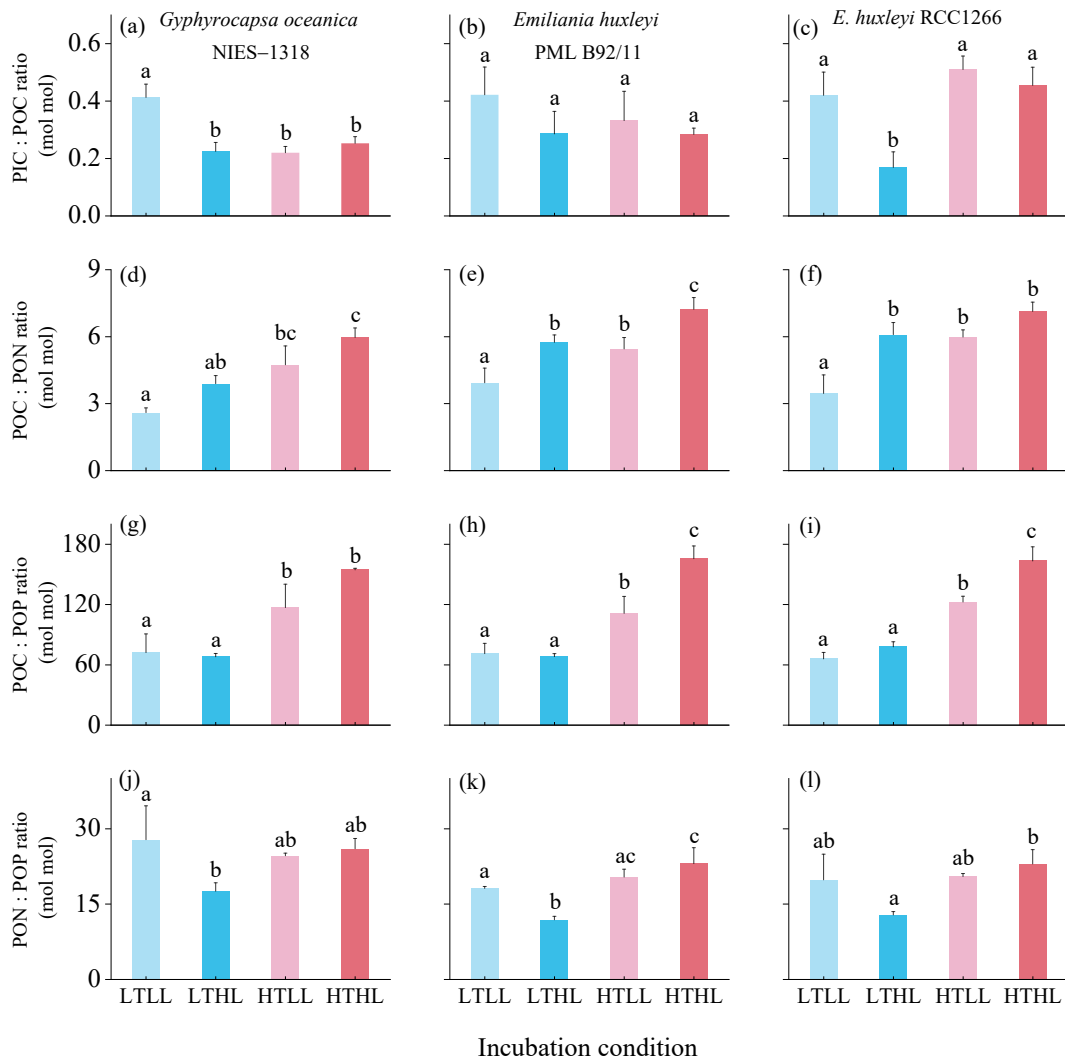

822

823

824

825 **Figure 3**

826

827

828

829

830

831

832

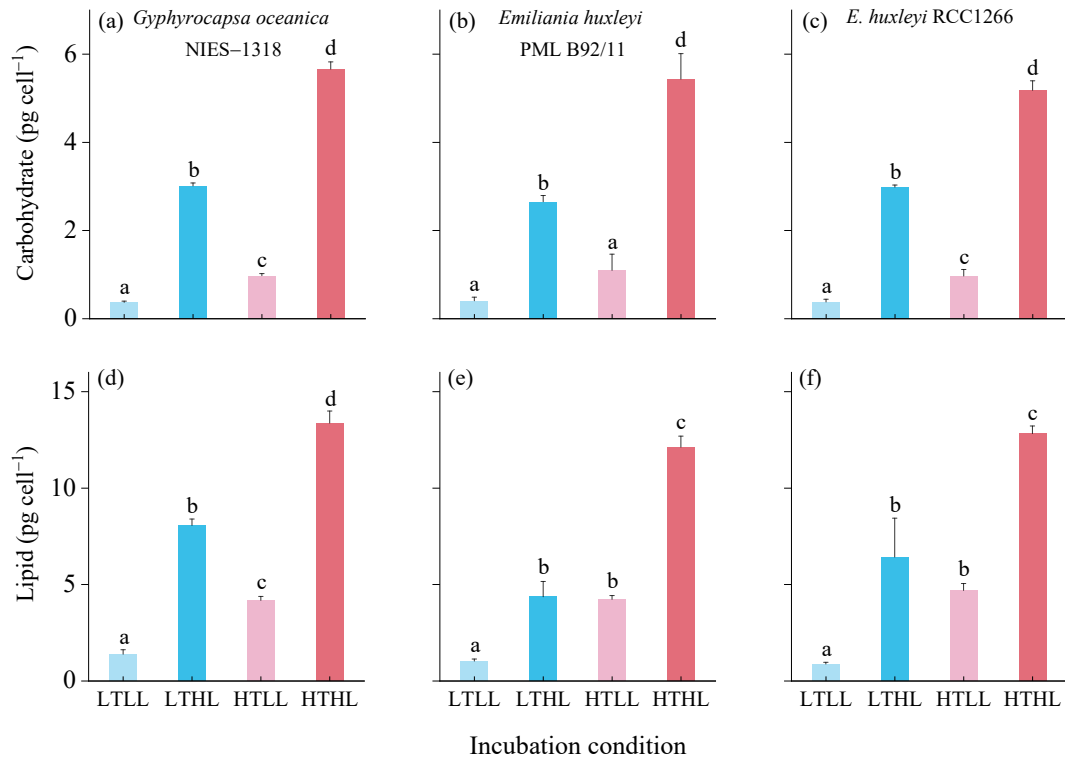

833

834

835

836 **Figure 4**

837

838

839

840

841

842

843

844

845

846

847

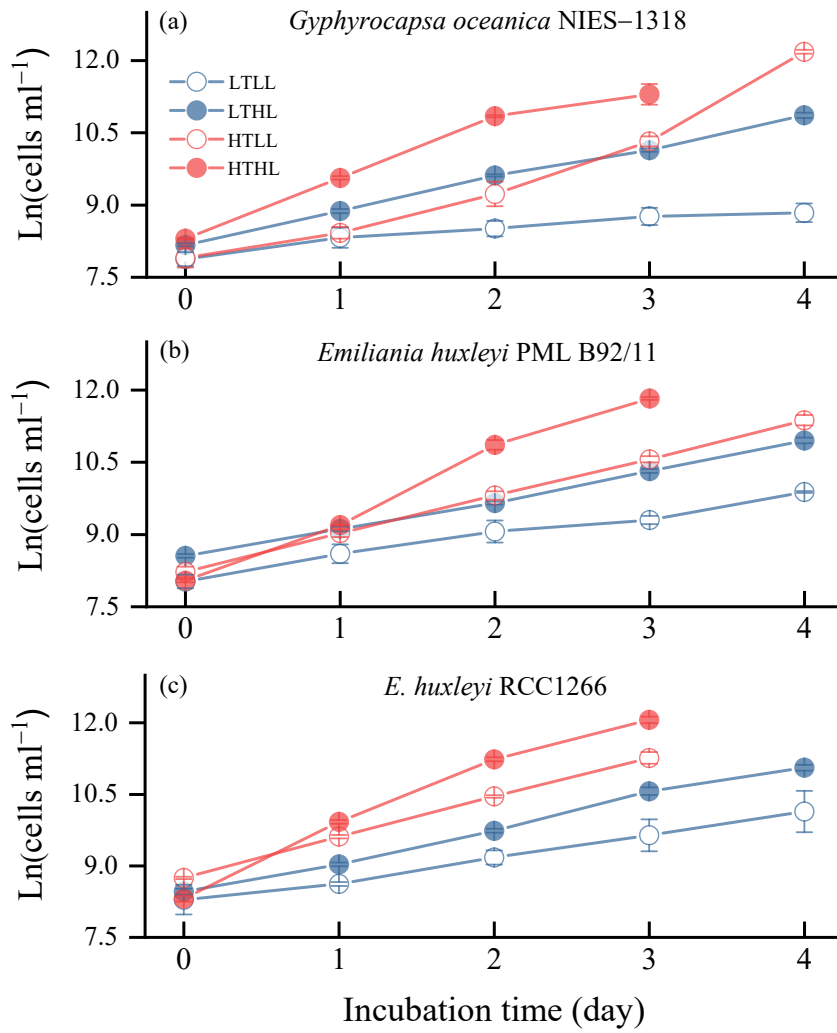

848

849

850

851 **Figure S1**

852

853

854

855

856

857

858

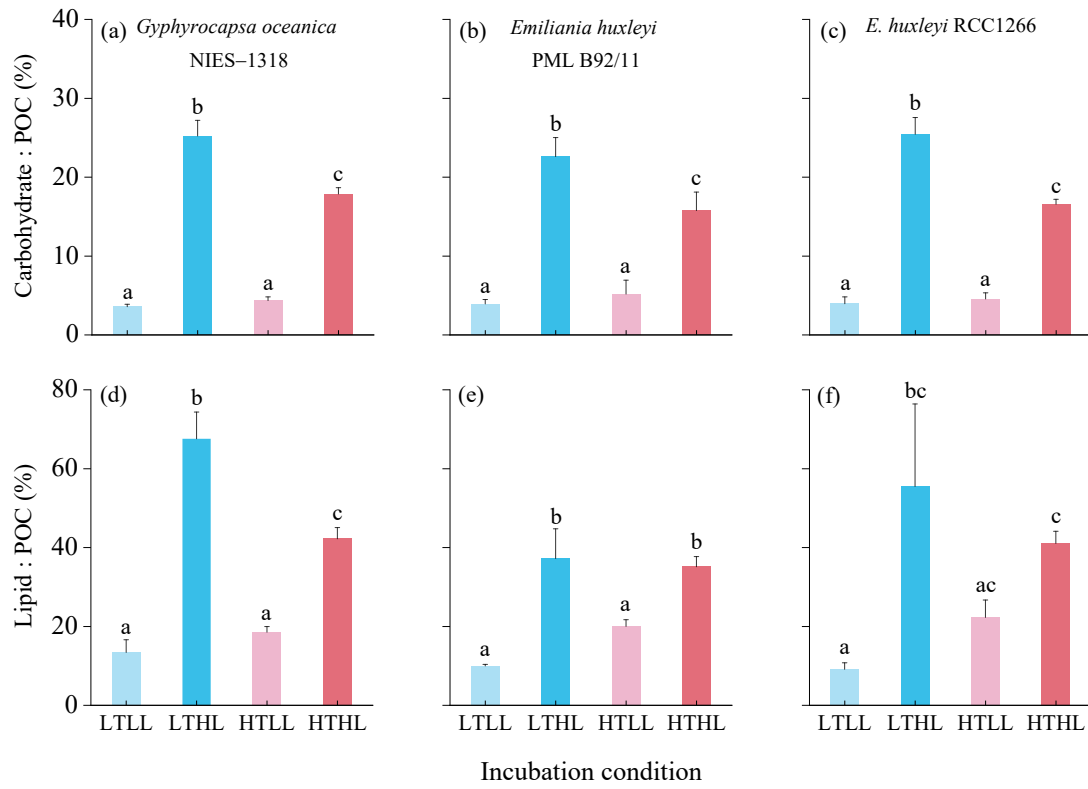

859

860

861

862 **Figure S2**

863

864
